# Supplementary material
Source: PubMed Central journal article supplement (PMC8325033)
Supplement: NIHMS1715326-supplement-1.pdf [file NIHMS1715326-supplement-1.pdf]

1  
2  
3  
4

## Appendix

**Table S1. The underlying study characteristics for the 15 gut microbiome studies.**

| Country      | Study design         | # of samples             | Sample type              | Variable region | Seq. platform  | Total reads per sample |
|--------------|----------------------|--------------------------|--------------------------|-----------------|----------------|------------------------|
| USA          | Cross-sectional      | 32 (14 HIV- & 18 HIV+)   | Rectal swabs             | V4              | Illumina MiSeq | 20,000                 |
| USA          | Prospective cohort   | 36 (15 HIV- & 21 HIV+)   | Stool samples            | V3-V5           | Roche 454      | 3,500                  |
| France       | Case-control         | 56 (26 HIV- & 31 HIV+)   | Stool samples            | V3-V4           | Illumina MiSeq | 5,500                  |
| USA          | Prospective cohort   | 37 (13 HIV- & 24 HIV+)   | Rectal swabs             | V4              | Illumina MiSeq | 18,000                 |
| Uganda       | Prospective cohort   | 106 (37 HIV- & 69 HIV+)  | Stool samples            | V4              | Illumina MiSeq | 10,000                 |
| USA          | Retrospective cohort | 40 (21 HIV- & 19 HIV+)   | Fecal samples from colon | V1-V3           | Roche 454      | 1,000                  |
| Spain/Sweden | Cross-sectional      | 233 (34 HIV- & 199 HIV+) | Stool samples            | V3-V4           | Illumina MiSeq | 10,000                 |
| Sweden       | Prospective cohort   | 40 (9 HIV- & 31 HIV+)    | Stool samples            | V3-V4           | Illumina MiSeq | 10,000                 |
| Nigeria      | Cross-sectional      | 119 (51 HIV- & 68 HIV+)  | Rectal swabs             | V3-V4           | Illumina MiSeq | 4,000                  |
| Mexico       | Cross-sectional      | 43 (10 HIV- & 33 HIV+)   | Stool samples            | V3-V4           | Illumina MiSeq | 15,500                 |
| Spain        | Prospective cohort   | 39 (9 HIV- & 30 HIV+)    | Stool samples            | V1-V3           | Roche 454      | 1,000                  |
| Spain        | Cross-sectional      | 24 (2 HIV- & 22 HIV+)    | Stool samples            | V3-V4           | Illumina MiSeq | 20,000                 |
| Sweden       | Cross-sectional      | 62 (15 HIV- & 47 HIV+)   | Stool samples            | V3-V4           | Illumina MiSeq | 4,000                  |
| Spain        | Cross-sectional      | 70 (21 HIV- & 49 HIV+)   | Stool samples            | V4              | Illumina MiSeq | 17,500                 |
| USA          | Prospective cohort   | 58 (35 HIV- & 23 HIV+)   | Rectal swabs             | V3-V4           | Illumina MiSeq | 2,000                  |

|              |                       |                    |                        |                       |                      |                     |                              |                     |                     |                             |                               |                               |                           |                                 |                  |
|--------------|-----------------------|--------------------|------------------------|-----------------------|----------------------|---------------------|------------------------------|---------------------|---------------------|-----------------------------|-------------------------------|-------------------------------|---------------------------|---------------------------------|------------------|
| <b>Study</b> | Dillion et al. (2014) | Dinh et al. (2015) | Lozupone et al. (2013) | Dubourg et al. (2013) | Monaco et al. (2016) | Mtulu et al. (2014) | Noguera-Julian et al. (2016) | Nowak et al. (2015) | Nowak et al. (2017) | Pinto-Cardoso et al. (2017) | Serrano-Villar et al. (2017a) | Serrano-Villar et al. (2017b) | Vesterbacka et al. (2017) | Villanueva-Millan et al. (2017) | Yu et al. (2014) |
|--------------|-----------------------|--------------------|------------------------|-----------------------|----------------------|---------------------|------------------------------|---------------------|---------------------|-----------------------------|-------------------------------|-------------------------------|---------------------------|---------------------------------|------------------|

5 **Table S2. The p-values on the disparity in microbial  $\alpha$ -diversity between HIV+ and HIV-**  
6 **persons using different methods of meta-analysis**

| Methods  | Asymptotic method<br>(Het. under $H_0$ ) |       | Permutation method<br>(Het. under $H_0$ ) |       | Permutation method<br>(No het. under $H_0$ ) |       |
|----------|------------------------------------------|-------|-------------------------------------------|-------|----------------------------------------------|-------|
|          | DL                                       | SJ    | DL                                        | SJ    | DL                                           | SJ    |
| Richness | <.001                                    | <.001 | <.001                                     | <.001 | <.001                                        | <.001 |
| Shannon  | <.001                                    | <.001 | <.001                                     | <.001 | <.001                                        | <.001 |
| Simpson  | <.001                                    | <.001 | <.001                                     | <.001 | <.001                                        | <.001 |
| PD       | 0.002                                    | 0.004 | 0.009                                     | 0.009 | 0.001                                        | 0.001 |
| PE       | 0.016                                    | 0.030 | 0.036                                     | 0.035 | 0.016                                        | 0.015 |
| PQE      | 0.205                                    | 0.249 | 0.232                                     | 0.232 | 0.182                                        | 0.176 |
| mMeta    | -                                        | -     | 0.006                                     | 0.006 | 0.002                                        | 0.002 |
| aMeta    | -                                        | -     | 0.001                                     | 0.001 | <.001                                        | <.001 |

7 \* [Asymptotic method (Het. under  $H_0$ )] represents the p-value calculation method based on the asymptotic  
8 normality and for the traditional random effects meta-analysis for the existence of heterogeneity under  $H_0$ ;  
9 [Permutation method (Het. under  $H_0$ )] represents the group permutation method and for the traditional random  
10 effects meta-analysis for the existence of heterogeneity under  $H_0$ ; [Permutation method (No het. under  $H_0$ )]  
11 represents the group permutation method and for the Han and Eskin's modified random effects meta-analysis for the  
12 assumption of no heterogeneity under  $H_0$ . \* DL and SJ represents the DerSimonian Laird (method of moments)  
13 estimator and the Sidik and Jonkman (robust variance or sandwich variance) estimator, respectively. \* Richness,  
14 Shannon, Simpson, PD, PE and PQE represent the Species richness, Shannon, Simpson, PD, PE and PQE indices,  
15 respectively.
