# Supplementary material
Source: PubMed Central journal article supplement (PMC8325033)

**A****Asymptotic; Het. under  $H_0$ ; DL**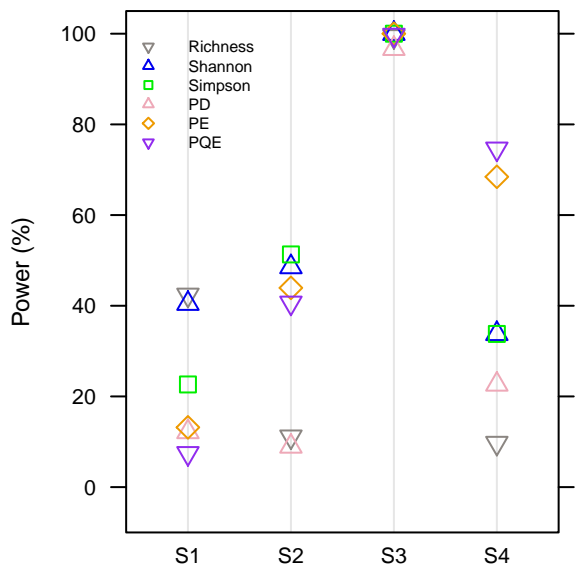**C****Permutation; Het. under  $H_0$ ; DL**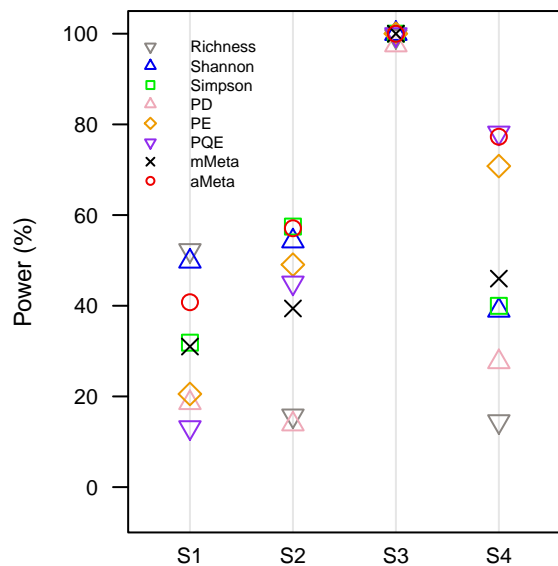**E****Permutation; No het. under  $H_0$ ; DL**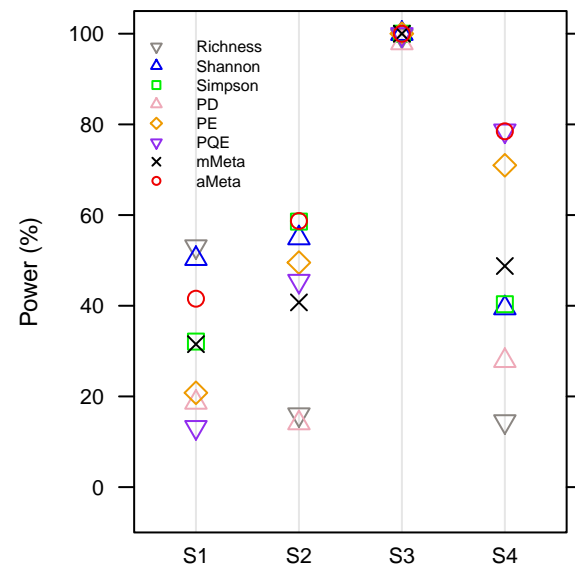**B****Asymptotic; Het. under  $H_0$ ; SJ**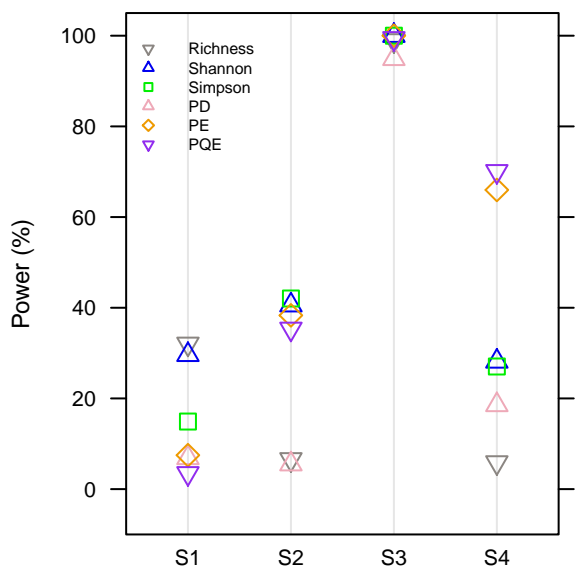**D****Permutation; Het. under  $H_0$ ; SJ**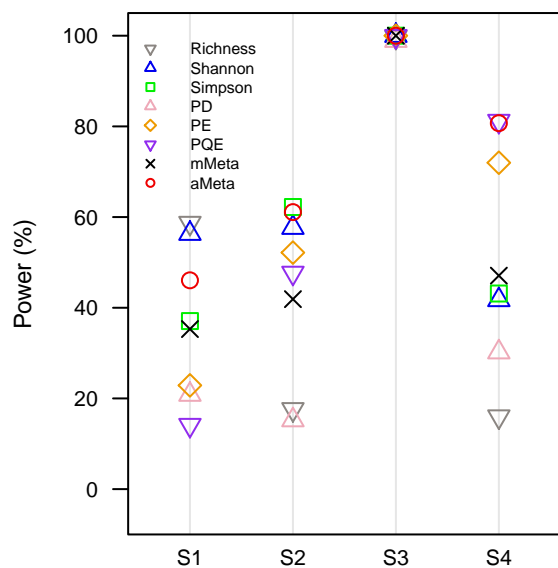**F****Permutation; No het. under  $H_0$ ; SJ**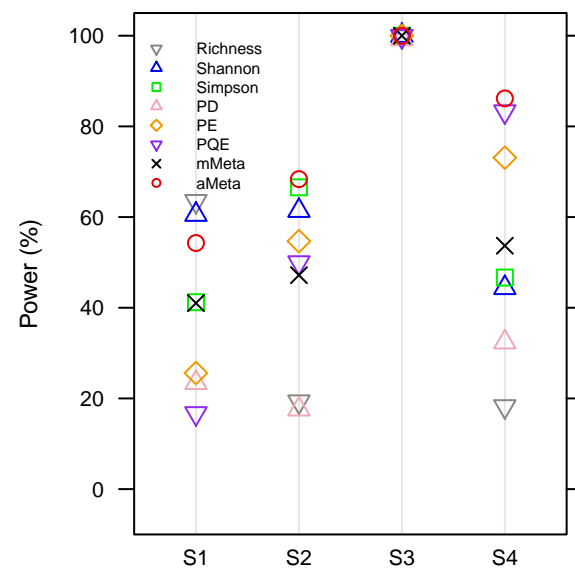

Supplement: NIHMS1715326-supplement-Fig_S2.pdf [file NIHMS1715326-supplement-Fig_S2.pdf]
